# Supplementary figures and images for: Hedgehog-stimulated stem cells depend on non-canonical activity of the Notch co-activator Mastermind
Source: Oxford University Press journal article supplement (doi:10.1242/dev.035329), 2009-05-28

GFP

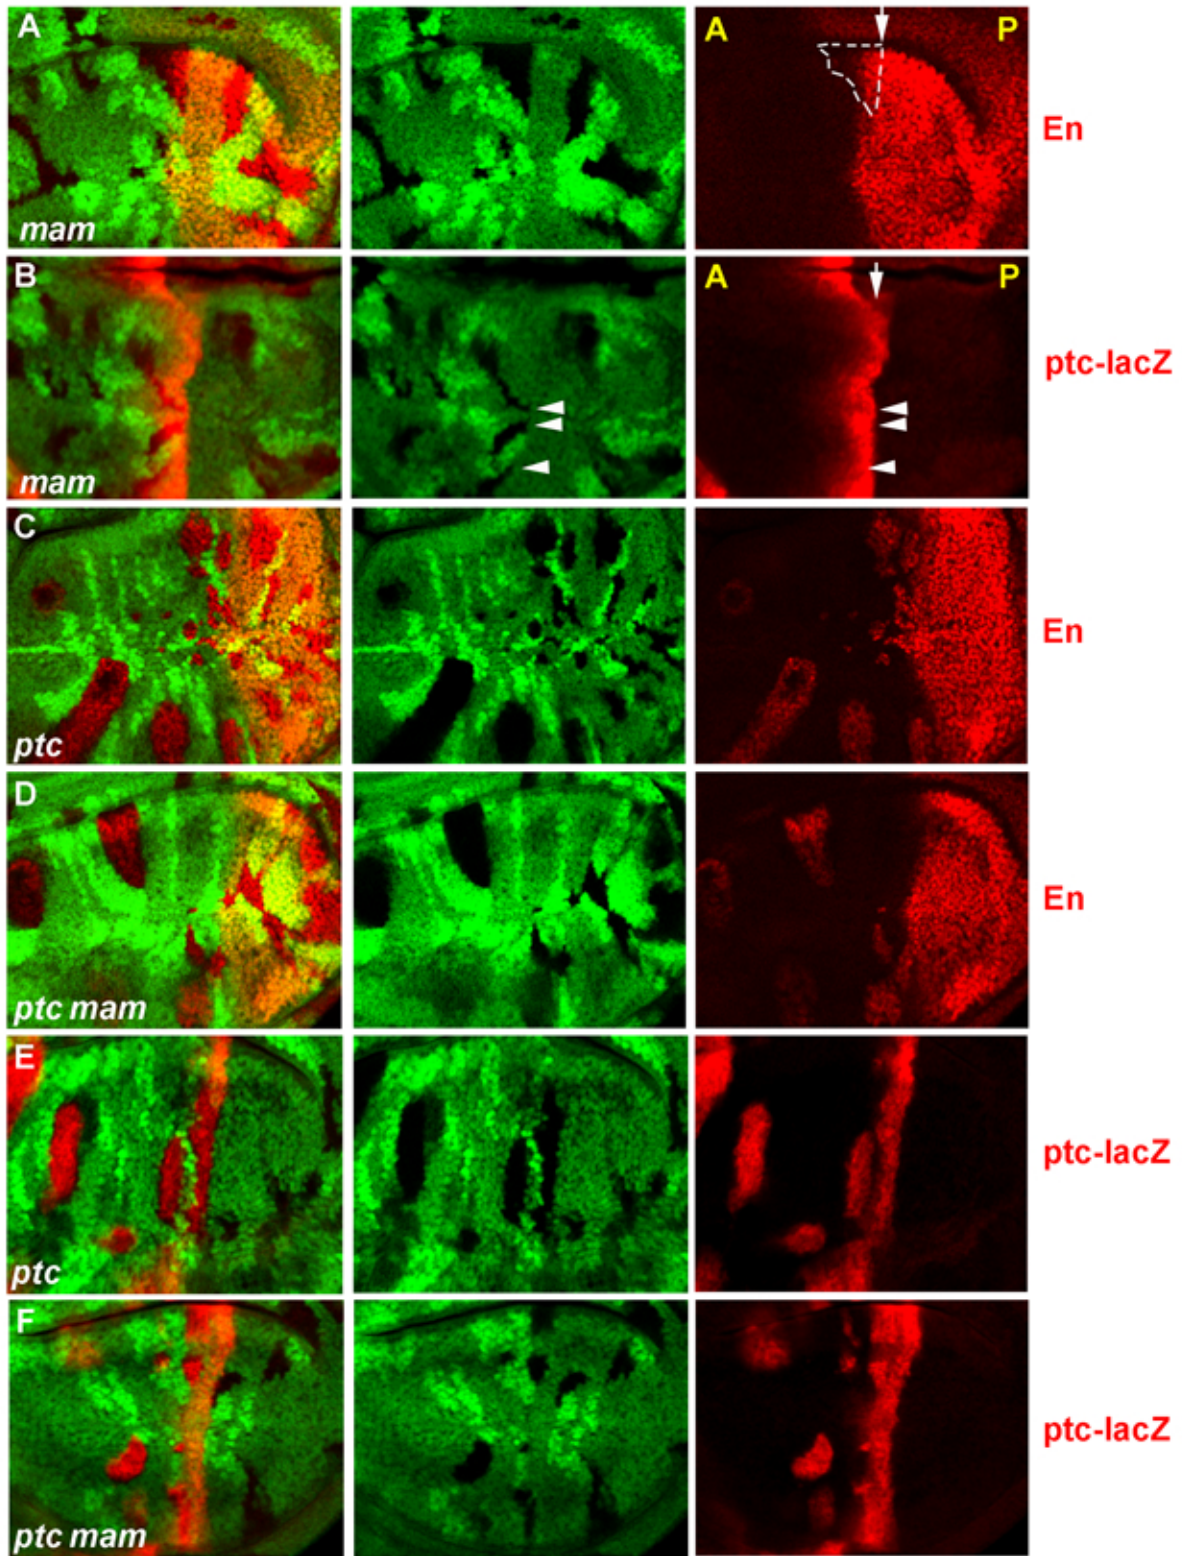

Supplement: dev035329-sup-035329-figs1.pdf [file dev035329-sup-035329-figs1.pdf]
